# Supplementary material for: Diel to Seasonal Variation of Picoplankton in the Tropical South China Sea
Source: Frontiers journal article supplement (doi:10.3389/fmars.2021.732017), 2021-10-21
Supplement: Data_Sheet_1.docx [file Data_Sheet_1.docx]

APPENDIX Supplemental Figures

Figure S1 Diel and vertical distribution of **temperature** in units of oC for OR1_1034 (A), OR1_1103 (B), OR1_1010 (C), OR1_1084 (D), OR1_944 (E), OR1_1053 (F), OR1_988 (G), and OR1_1060 (H). Black dots denote seawater samplings; and the black bar on the top denotes the nighttime. Dashed line denotes the mixed layer depth (MLD).

Figure S2 Diel and vertical distribution of **nitrate** in units of M for OR1_1034 (A), OR1_1103 (B), OR1_1010 (C), OR1_1084 (D), OR1_944 (E), OR1_1053 (F), OR1_988 (G), and OR1_1060 (H). Black dots denote seawater samplings; and the black bar on the top denotes the nighttime. Dashed line denotes the nitracline depth defined as the nitrate concentration of 1 M.

Figure S3 Diel and vertical distribution of **phosphate** in units of M for OR1_1034 (A), OR1_1103 (B), OR1_1010 (C), OR1_1084 (D), OR1_944 (E), OR1_1053 (F), OR1_988 (G), and OR1_1060 (H). Black dots denote seawater samplings; and the black bar on the top denotes the nighttime.

Figure S4 Diel and vertical distribution of **silicate** in units of M for OR1_1034 (A), OR1_1103 (B), OR1_1010 (C), OR1_1084 (D), OR1_944 (E), OR1_1053 (F), OR1_988 (G), and OR1_1060 (H). Black dots denote seawater samplings; and the black bar on the top denotes the nighttime.

Figure S5 Diel and vertical distribution of **Dissolved Organic Carbon (DOC)** in units of M for OR1_1034 (A), OR1_1103 (B), OR1_1010 (C), OR1_1084 (D), OR1_944 (E), OR1_1053 (F), OR1_988 (G), and OR1_1060 (H). Black dots denote seawater samplings; and the black bar on the top denotes the nighttime.

Figure S6 Diel and vertical distribution of **chlorophyll-a** in units of mg m-3 for OR1_1034 (A), OR1_1103 (B), OR1_1010 (C), OR1_1084 (D), OR1_944 (E), OR1_1053 (F), OR1_988 (G), and OR1_1060 (H). Since measured chlorophyll-a was not available for OR1_1060, the contour (H) represents the fluorescence directly from the CTD sensor. Black dots denote seawater samplings; and the black bar on the top denotes the nighttime.

Figure S7 Diel and vertical distribution of ***Prochlorococcus*** in units of x104 cells mL-1 for OR1_1034 (A), OR1_1103 (B), OR1_1010 (C), OR1_1084 (D), OR1_944 (E), OR1_1053 (F), OR1_988 (G), and OR1_1060 (H). Black dots denote seawater samplings; and the black bar on the top denotes the nighttime.

Figure S8 Diel and vertical distribution of ***Synechococcus*** in units of x103 cells mL-1 for OR1_1034 (A), OR1_1103 (B), OR1_1010 (C), OR1_1084 (D), OR1_944 (E), OR1_1053 (F), OR1_988 (G), and OR1_1060 (H). Black dots denote seawater samplings; and the black bar on the top denotes the nighttime.

Figure S9 Diel and vertical distribution of **picoeukaryotes** in units of x103 cells mL-1 for OR1_1034 (A), OR1_1103 (B), OR1_1010 (C), OR1_1084 (D), OR1_944 (E), OR1_1053 (F), OR1_988 (G), and OR1_1060 (H). Black dots denote seawater samplings; and the black bar on the top denotes the nighttime.

Figure S10 Diel and vertical distribution of **heterotrophic bacteria** in units of x105 cells mL-1 for OR1_1034 (A), OR1_1103 (B), OR1_1010 (C), OR1_1084 (D), OR1_944 (E), OR1_1053 (F), OR1_988 (G), OR1_1060 (H). Black dots denote seawater samplings; and the black bar on the top denotes the nighttime.
